# Supplementary material for: GP96 is a GARP chaperone and controls regulatory T cell functions
Source: JCI journal article supplement (doi:10.1172/jci79014), 2015-01-19
Supplement: sd1 [file 1]

**Supplemental data:**

**gp96/grp94 Chaperones GARP and Controls Functions of Regulatory T Cells**

Yongliang Zhang<sup>1</sup>, Bill X Wu<sup>1</sup>, Alessandra Metelli<sup>1</sup>, Jessica Thaxon<sup>1</sup>, Feng Hong<sup>1</sup>, Saleh Rachidi<sup>1</sup>, Ephraim Ansa-Addo<sup>1</sup>, Shaoli Sun<sup>2</sup>, Chenthamarakshan Vasu<sup>1</sup>, Yi Yang<sup>1</sup>, Bei Liu<sup>1</sup> and Zihai Li<sup>1#</sup>

<sup>1</sup>Department of Microbiology & Immunology, Hollings Cancer Center, Medical University of South Carolina, Charleston, SC, USA

<sup>2</sup>Department of Pathology & Laboratory Medicine, Medical University of South Carolina, Charleston, SC 29425

#Corresponding author: Zihai Li, Medical University of South Carolina, 86 Jonathan Lucas Street, Charleston, SC 29425. Phone: 843-792-1034; Fax: 843-792-9588; E-mail: zihai@musc.edu

**6 Figures**

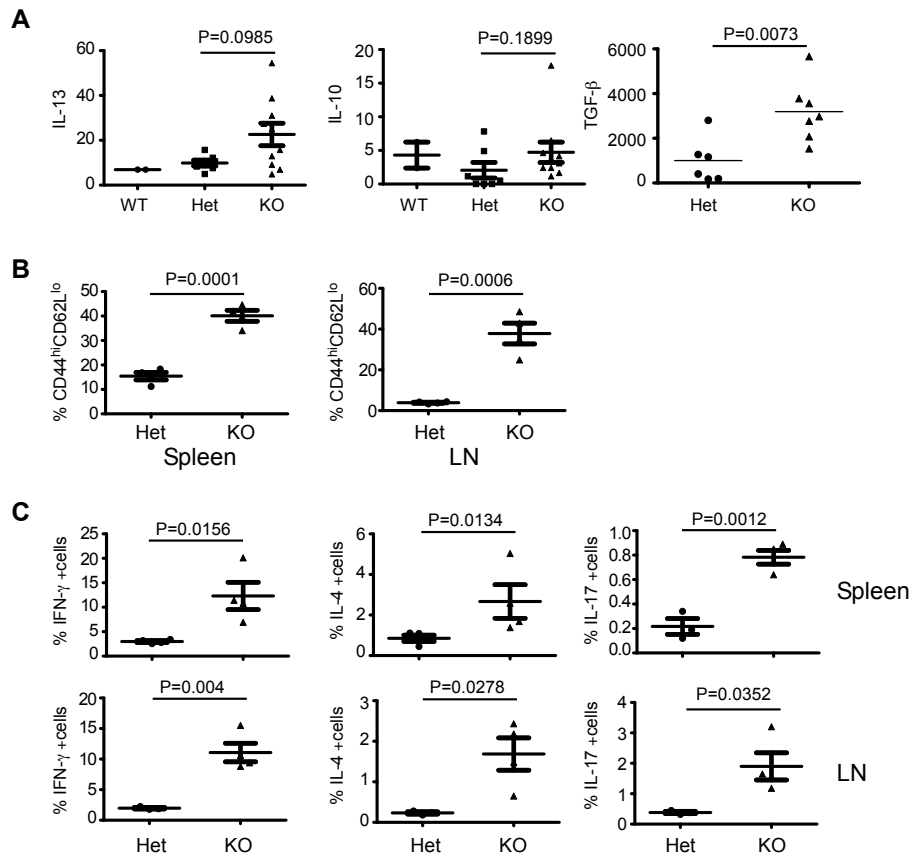

**Supplement Figure 1.** Uncontrolled systemic inflammatory diseases in *Hsp90b1<sup>flox/flox</sup>Foxp3-EGFP<sup>cre</sup>* mice. **(A)** Serum inflammatory cytokine level (pg/ml) of IL-13, IL-10, TGF-β in WT, Het and KO mice. Each dot represents value from one individual mouse. Bars: means±SEM. **(B)** Statistical analysis of CD4<sup>+</sup> cells with high CD44 and low CD62L expression in 6-week-old KO mice and Het littermates. Bars: means±SEM. **(C)** Flow cytometry analysis of intracellular IFN-γ, IL-4, IL-17, IL-6 production, in response to PMA/ionomycin, by splenic CD4<sup>+</sup> T cells from KO mice and Het NOD mice. Bars: means±sem. Two-tailed Student's *t* test was used for comparison of experimental groups.

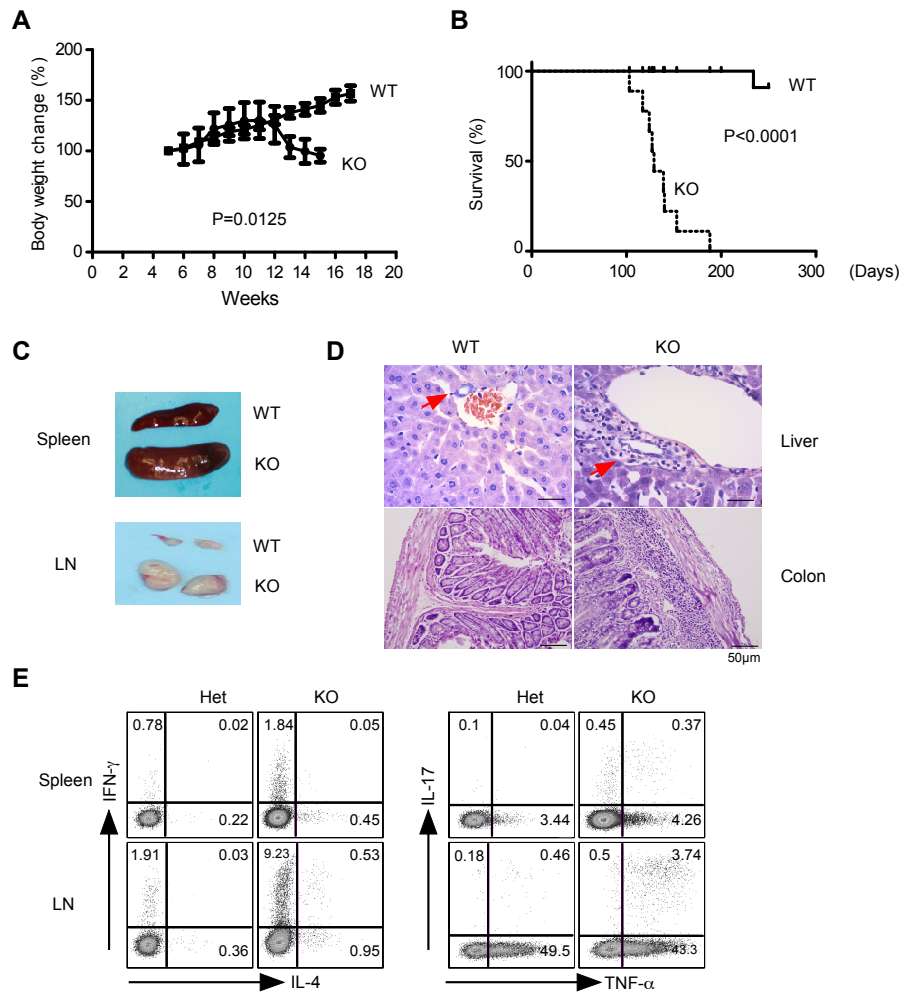

**Supplement Figure 2. CD4-cre mediated deletion of gp96 in C57B/L6 mice results in systemic inflammatory diseases.** (A, B) Rapid body weight loss and death of *Hsp90b<sup>flox/flox</sup>CD4<sup>cre</sup>* mice (n=13) compared with littermate control, *Hsp90b<sup>flox/wt</sup>CD4<sup>cre</sup>* (n=11). Bars (A): mean $\pm$ sem. (C) Representative images from multiple mice demonstrate the evidence of splenomegaly and lymphadenopathy in KO mice. (D) Representative images of Haematoxylin and Eosin staining of liver and colon sections from 20-week-old *Hsp90b<sup>flox/flox</sup>CD4<sup>cre</sup>* and Het littermate. Scale bar: 100  $\mu$ m (colon), 50  $\mu$ m (liver). (E) Flow cytometry analysis of cytokine production intracellularly by splenic or LN CD4<sup>+</sup> T cells from KO and Het littermates. Shown are representative data from two independent experiments. Statistic difference of body weight change in (A) was confirmed with two-way ANOVA, and mouse survival differences in (B) were analyzed with log-rank (Mantel-Cox) test.

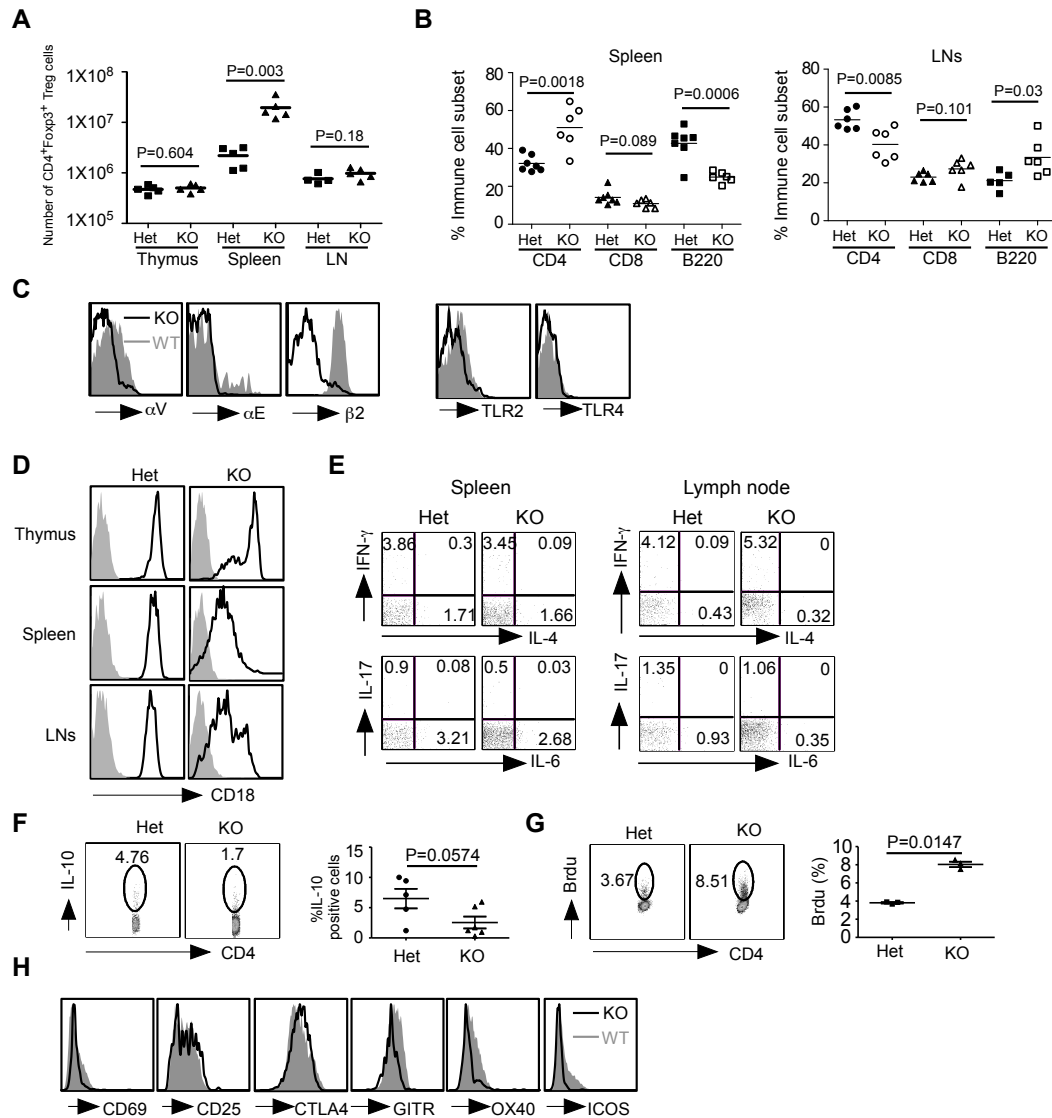

**Supplement Figure 3. Characterization of T<sub>reg</sub> cells and other subsets of immune cells in mice with T<sub>reg</sub>-specific deletion of gp96.** (A) Absolute T<sub>reg</sub> cell number in different immune organs. Bar: mean ± sem. (B) Immune cell subset distribution in the spleen and lymph node. Bar: mean ± sem. (C) Flow cytometry analysis of indicated cell surface integrins and TLRs of T<sub>reg</sub> cells from *Hsp90<sup>fllox/fllox</sup> Foxp3-EGFP<sup>cre</sup>* mice and WT littermate. Data represent two independent experiments. (D) Flow cytometry analysis of CD18 expression by CD4<sup>+</sup>Foxp3<sup>+</sup> cells from thymus, spleen and Lymph nodes. (E) Flow cytometry analysis of intracellular IFN-γ, IL-4, IL-17 and IL-6 expression by CD4<sup>+</sup>Foxp3<sup>+</sup> T cells from the spleen and LNs. Numbers represent percentage of cells in each quadrant. Data represent three independent experiments. (F). Flow cytometry analysis of intracellular IL-10 expression (%) by CD4<sup>+</sup>Foxp3<sup>+</sup> T cells from spleen and LNs. (G) Flow cytometric analysis of BrdU incorporation (%) by Het and KO CD4<sup>+</sup>Foxp3<sup>+</sup> T cells from the spleens. (H) Flow cytometric analysis of splenic T<sub>reg</sub> cells for the indicated cell surface markers from bone marrow chimeric mice transplanted with 1:1 mixture of CD45.2<sup>+</sup> WT and CD45.1<sup>+</sup> KO bone marrows. Data represent three independent experiments. The two-tailed Student's *t* test was used for comparisons between Het and KO mice.

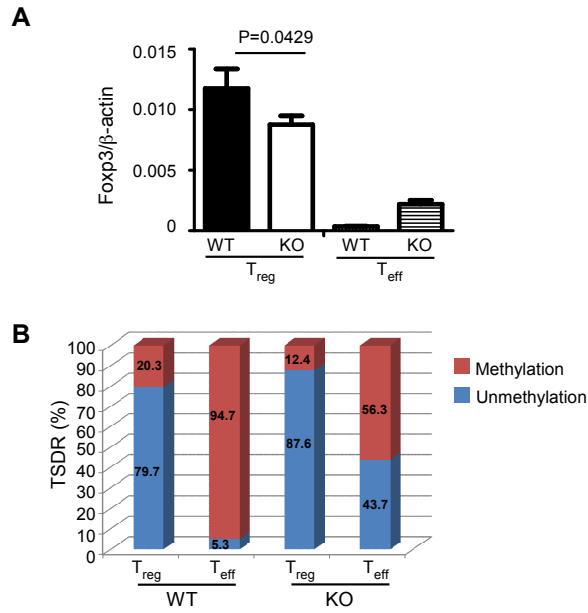

**Supplement Figure 4. Quantification of *Foxp3* mRNA expression level and *Foxp3* promoter methylation status.** CD4<sup>+</sup>CD25<sup>+</sup> T<sub>reg</sub> cells and CD4<sup>+</sup>CD25<sup>-</sup> T effector cells were isolated by MACS beads followed by isolation of mRNA and genomic DNA. **(A)** Quantification of *Foxp3* mRNA by q-RT-PCR. Data represent two independent experiments. Two-tailed Student's *t* test were used for comparisons between WT and KO mice. **(B)** DNA demethylation in the TDSR region was quantified with demethylation-specific probe by the Taqman Real time-PCR as described in Materials and Methods. Four independent experiments were performed with similar findings. Data represent mean ± sem (A) and mean (B).

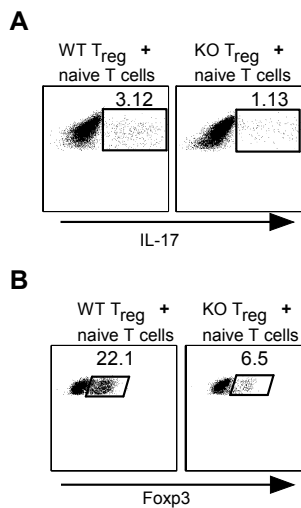

**Supplement Figure 5. Compromised activity of gp96 KO T<sub>reg</sub> cells in driving T<sub>h17</sub> cells and iT<sub>reg</sub> cell differentiation *in vitro*.** (A, B) CD4<sup>+</sup>CD25<sup>+</sup> T<sub>reg</sub> cells were activated with plate bound anti-CD3 antibody (2 μg/ml) for 2-3 days, followed by irradiation (2000 cGy) and co-culturing with CFSE-labeled CD4<sup>+</sup>CD25<sup>-</sup> naïve T cells for 3 days, in the presence of anti-CD3 antibody and IL-2 for T<sub>reg</sub> cells, and additional IL-6 for T<sub>h17</sub> cells as described in Materials and Methods. Intracellular staining of IL-17 and Foxp3 were performed, followed by flow cytometry. Data represent more than three independent experiments.

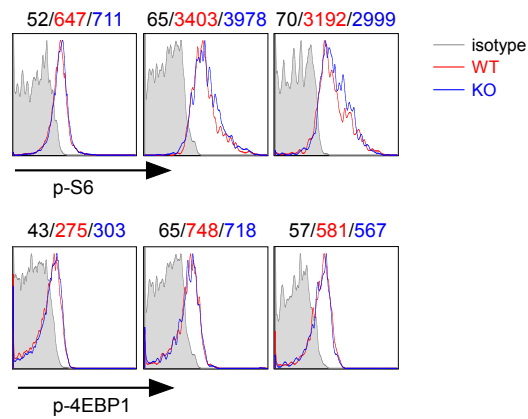

**Supplement Figure 6. gp96-deficient T cells exhibit normal mTORC1 activity.** Phosphorylation of p-S6 (upper panel) and 4E-BP1 (lower panel) in freshly isolated naïve T cells (CD4<sup>+</sup>CD44<sup>low</sup>Foxp3<sup>-</sup>, Left), T<sub>reg</sub> cells (CD4<sup>+</sup>Foxp3<sup>+</sup>, Middle), and memory-phenotype (MP) T cells (CD4<sup>+</sup>CD44<sup>high</sup>Foxp3<sup>-</sup>, Right). Numbers above the plots indicate mean fluorescent intensity (MFI). Two independent experiments were performed with similar findings.
